# Supplementary material for: Survival improvement in patients with pancreatic cancer by decade: A period analysis of the SEER database, 1981–2010
Source: PubMed Central journal article supplement — Sci Rep. 2014 Oct 23;4:6747. doi: 10.1038/srep06747 (PMC5381379; doi:10.1038/srep06747), 2014-10-23
Supplement: srep06747-s1.pdf [file srep06747-s1.pdf]

## SUPPLEMENTARY INFORMATION

### **Survival improvement in patients with pancreatic cancer by decade: A period analysis of the SEER database, 1981-2010**

Huanhuan Sun<sup>1†</sup>, Haiqing Ma<sup>1†\*</sup>, Guobin Hong<sup>2†</sup>, Hongliu Sun<sup>3</sup> & Jin Wang<sup>4\*</sup>

<sup>1</sup>Department of Oncology, The Fifth Affiliated Hospital of Sun Yat-sen University, Zhuhai, Guangdong 519000, China;

<sup>2</sup>Department of Radiology, The Fifth Affiliated Hospital of Sun Yat-sen University, Zhuhai, Guangdong 519000, China;

<sup>3</sup>Department of Pathology, University of Toledo Medical Center, Toledo, OH 43614, United States;

<sup>4</sup>Department of Translational Molecular Pathology, The University of Texas MD Anderson Cancer Center, Houston, TX 77030, United States.

<sup>†</sup>These authors contributed equally to this work.

\*Correspondence to: Haiqing Ma, M.D. & Ph.D., (haiqingma10@gmail.com); Jin Wang, Ph.D., (JWang4@mdanderson.org)

- 4 Supplementary Figures
- 6 Supplementary Tables

Supplementary Figure S1

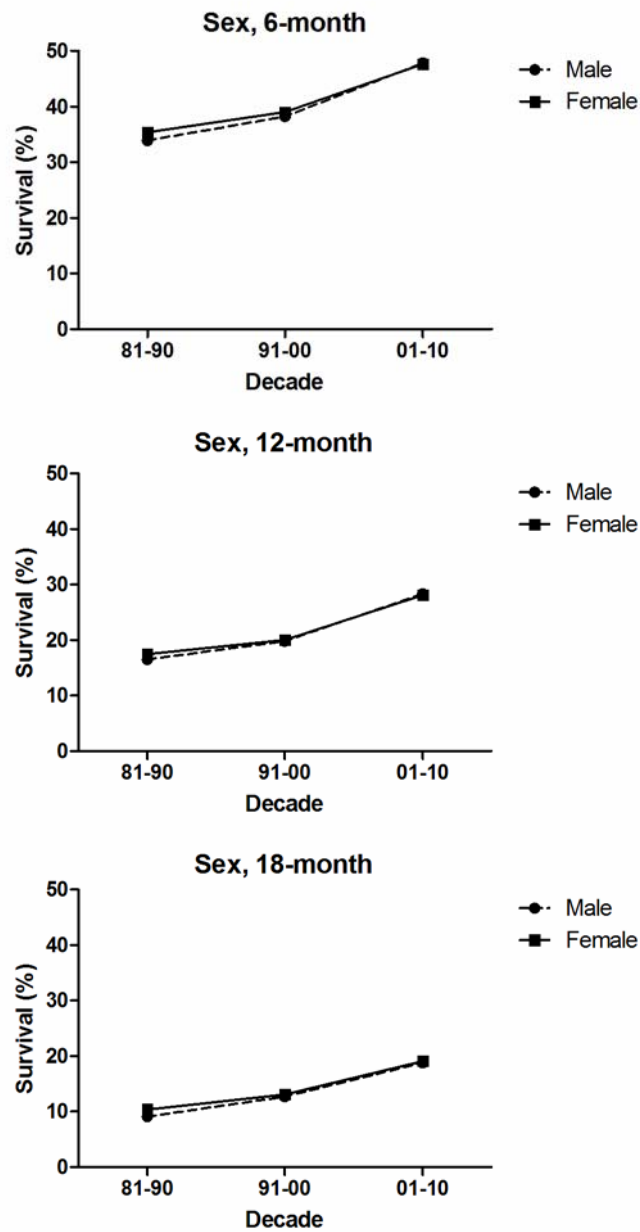

Supplementary Figure S1. Six-month, 12-month, and 18-month relative survival rates for patients with PaCa from 1981 to 2010 at nine SEER sites by sex and calendar period.

## Supplementary Figure S2

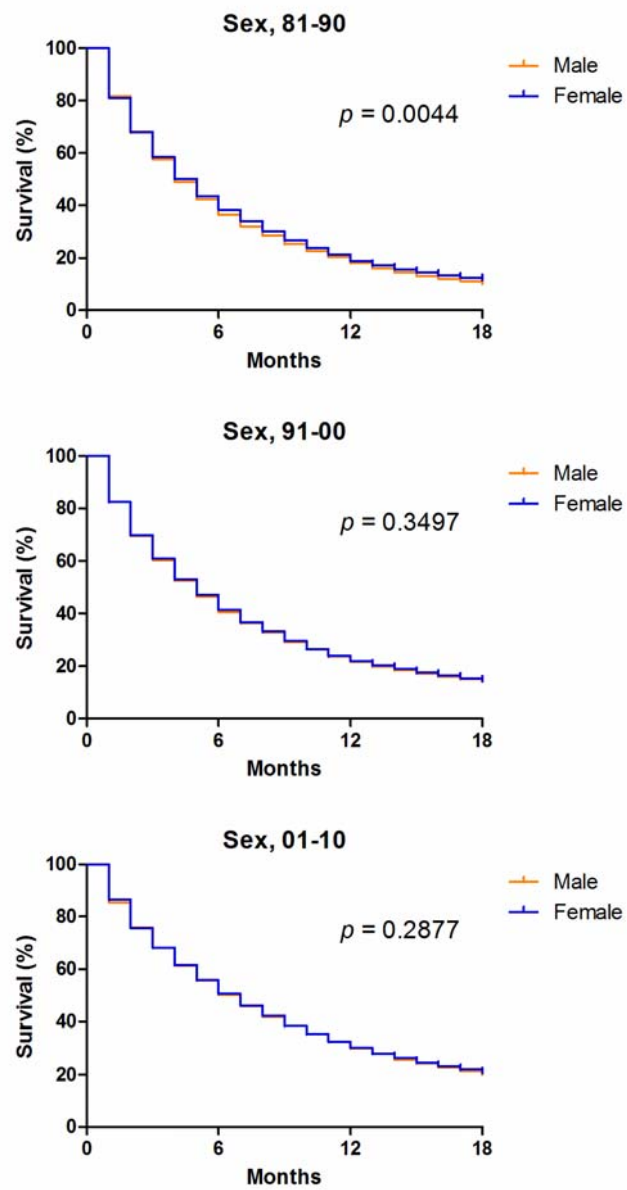

**Supplementary Figure S2.** Kaplan-Meier survival analysis for patients with PaCa from nine SEER sites from 1981 to 2010 according to sex and calendar period.

## Supplementary Figure S3

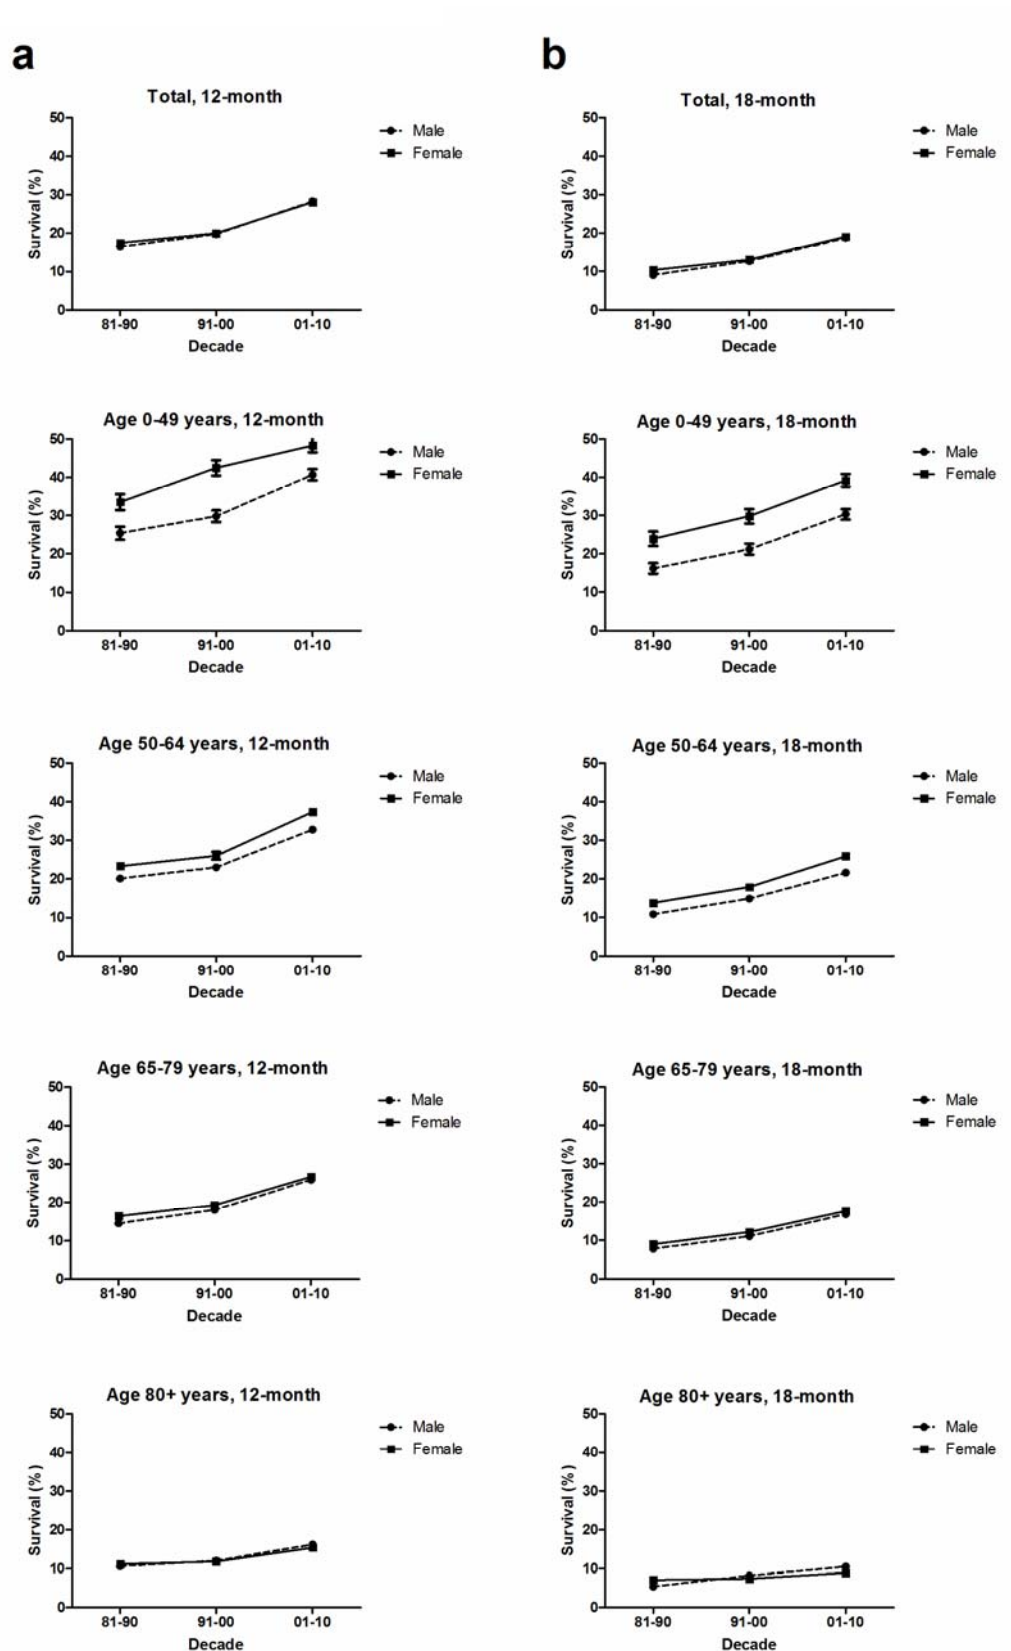

**Supplementary Figure S3.** Twelve-month (a) and 18-month (b) relative survival rates for patients with PaCa at nine SEER sites from 1981 to 2010 according to sex and age group (total and ages 0-49, 50-64, 65-79, and 80+ years).

## Supplementary Figure S4

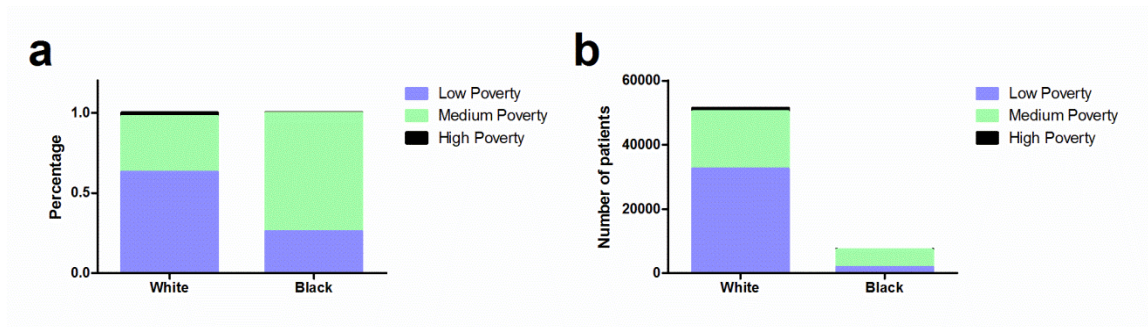

**Supplementary Figure S4.** Distribution of SES by race for patients with PaCa at nine SEER sites from 1981 to 2010. Percentage (a) and number (b) of patients with PaCa in low-poverty, medium-poverty, and high-poverty groups.

**Supplementary Table S1.** The incidence of PaCa according to age group and decade

within sex, SES, and race groups from 1981 to 2010 at the nine original SEER sites.

Data are incidence per 100,000 people by year of diagnosis, with the number of patients in parentheses.

| Variable | Age Group      | Decade    |         |           |         |           |         |
|----------|----------------|-----------|---------|-----------|---------|-----------|---------|
|          |                | 1981-1990 |         | 1991-2000 |         | 2001-2010 |         |
| Total    | All            | 9.7       | (19024) | 8.6       | (20101) | 8.8       | (24405) |
|          | 0-49           | 0.9       | (1176)  | 0.8       | (1484)  | 0.9       | (1884)  |
|          | 50-64          | 15.9      | (5128)  | 14.6      | (5006)  | 15.6      | (7555)  |
|          | 65-79          | 46.3      | (8931)  | 42.6      | (9498)  | 43.1      | (9946)  |
|          | 80+            | 69.0      | (3789)  | 55.1      | (4113)  | 52.2      | (5020)  |
| Sex      | Male           |           |         |           |         |           |         |
|          | All            | 11.3      | (9432)  | 9.7       | (9811)  | 9.8       | (12232) |
|          | 0-49           | 1.1       | (685)   | 1.0       | (898)   | 1.1       | (1063)  |
|          | 50-64          | 19.4      | (2986)  | 17.7      | (2936)  | 18.9      | (4454)  |
|          | 65-79          | 53.5      | (4391)  | 47.2      | (4577)  | 46.8      | (4856)  |
|          | 80+            | 78.8      | (1370)  | 56.6      | (1400)  | 54.0      | (1859)  |
|          | Female         |           |         |           |         |           |         |
|          | All            | 8.4       | (9592)  | 7.6       | (10290) | 7.9       | (12173) |
|          | 0-49           | 0.8       | (491)   | 0.6       | (586)   | 0.8       | (821)   |
|          | 50-64          | 12.6      | (2142)  | 11.7      | (2070)  | 12.4      | (3101)  |
|          | 65-79          | 41.0      | (4540)  | 39.0      | (4921)  | 40.0      | (5090)  |
|          | 80+            | 64.5      | (2419)  | 54.2      | (2713)  | 51.1      | (3161)  |
| SES      | Low poverty    |           |         |           |         |           |         |
|          | All            | 9.5       | (10321) | 8.5       | (11219) | 8.8       | (14695) |
|          | 0-49           | 0.9       | (627)   | 0.8       | (818)   | 1.0       | (1171)  |
|          | 50-64          | 15.2      | (2723)  | 14.4      | (2787)  | 15.4      | (4480)  |
|          | 65-79          | 45.8      | (4844)  | 42.1      | (5235)  | 43.4      | (5922)  |
|          | 80+            | 69.5      | (2127)  | 55.5      | (2379)  | 52.9      | (3122)  |
|          | Medium poverty |           |         |           |         |           |         |
|          | All            | 9.9       | (8297)  | 8.8       | (8452)  | 8.9       | (9209)  |
|          | 0-49           | 1.0       | (529)   | 0.9       | (635)   | 0.9       | (682)   |
|          | 50-64          | 16.9      | (2307)  | 15.1      | (2114)  | 16.1      | (2911)  |
|          | 65-79          | 46.8      | (3875)  | 43.7      | (4055)  | 43.5      | (3795)  |
|          | 80+            | 68.3      | (1586)  | 54.6      | (1648)  | 52.3      | (1821)  |
|          | High poverty   |           |         |           |         |           |         |
|          | All            | 9.2       | (404)   | 7.4       | (430)   | 6.5       | (497)   |
|          | 0-49           | 0.6       | (19)    | 0.7       | (31)    | 0.6       | (31)    |
|          | 50-64          | 12.8      | (97)    | 11.6      | (105)   | 12.8      | (163)   |
|          | 65-79          | 48.0      | (212)   | 36.9      | (208)   | 32.5      | (227)   |
|          | 80+            | 70.0      | (76)    | 51.2      | (86)    | 33.6      | (76)    |
| Race     | White          |           |         |           |         |           |         |

|       |       |      |         |      |         |      |         |
|-------|-------|------|---------|------|---------|------|---------|
|       | All   | 9.3  | (15977) | 8.3  | (16311) | 8.5  | (19149) |
|       | 0-49  | 0.8  | (893)   | 0.8  | (1102)  | 0.9  | (1379)  |
|       | 50-64 | 15.0 | (4118)  | 13.9 | (3909)  | 15.0 | (5760)  |
|       | 65-79 | 45.2 | (7585)  | 41.4 | (7782)  | 42.2 | (7889)  |
|       | 80+   | 68.5 | (3381)  | 53.7 | (3518)  | 50.5 | (4121)  |
| Black | All   | 13.9 | (2029)  | 13.1 | (2377)  | 12.2 | (2950)  |
|       | 0-49  | 1.6  | (192)   | 1.4  | (263)   | 1.3  | (315)   |
|       | 50-64 | 27.4 | (712)   | 24.5 | (745)   | 23.2 | (1118)  |
|       | 65-79 | 62.1 | (862)   | 62.6 | (1021)  | 57.1 | (1076)  |
|       | 80+   | 86.5 | (263)   | 77.3 | (348)   | 73.8 | (441)   |
| Other | All   | 8.5  | (1005)  | 7.3  | (1394)  | 7.7  | (2236)  |
|       | 0-49  | 0.9  | (88)    | 0.7  | (115)   | 0.7  | (180)   |
|       | 50-64 | 13.0 | (291)   | 10.8 | (345)   | 12.3 | (654)   |
|       | 65-79 | 42.8 | (481)   | 37.1 | (688)   | 37.8 | (949)   |
|       | 80+   | 58.4 | (145)   | 51.8 | (246)   | 52.9 | (453)   |

---

Abbreviations: SES, socioeconomic status.

**Supplementary Table S2.** 12-month and 18-month relative survival rates of PaCa patients according to sex, age group, and calendar period from 1981 to 2010 at nine SEER sites. Data are means  $\pm$  standard error of the mean, with number of patients in parentheses.

| Decade    | Age Group | Sex                   |                          |                        |
|-----------|-----------|-----------------------|--------------------------|------------------------|
|           |           | Male                  | Female                   |                        |
| 81-90     | 12-mo RSR |                       |                          |                        |
|           | All       | 16.5 $\pm$ 0.4 (9432) | 17.5 $\pm$ 0.4 (9592)    |                        |
|           | 0-49      | 25.4 $\pm$ 1.7 (685)  | 33.5 $\pm$ 2.1 (491)*    |                        |
|           | 50-64     | 20.1 $\pm$ 0.7 (2986) | 23.3 $\pm$ 0.9 (2142)*   |                        |
|           | 65-79     | 14.5 $\pm$ 0.5 (4391) | 16.4 $\pm$ 0.6 (4540)    |                        |
|           | 80+       | 10.6 $\pm$ 0.9 (1370) | 11.2 $\pm$ 0.7 (2419)    |                        |
|           | 18-mo RSR |                       |                          |                        |
|           | All       | 9.1 $\pm$ 0.3         | 10.4 $\pm$ 0.3*          |                        |
|           | 0-49      | 16.2 $\pm$ 1.4        | 23.9 $\pm$ 1.9**         |                        |
|           | 50-64     | 10.9 $\pm$ 0.6        | 13.8 $\pm$ 0.8*          |                        |
|           | 65-79     | 7.9 $\pm$ 0.4         | 9.0 $\pm$ 0.4            |                        |
|           | 80+       | 5.4 $\pm$ 0.7         | 7.1 $\pm$ 0.6            |                        |
|           | 91-00     | 12-mo RSR             |                          |                        |
|           |           | All                   | 19.8 $\pm$ 0.4 (9811)    | 20.0 $\pm$ 0.4 (10290) |
| 0-49      |           | 29.8 $\pm$ 1.5 (898)  | 42.5 $\pm$ 2.0 (586)***  |                        |
| 50-64     |           | 23.0 $\pm$ 0.8 (2936) | 26.0 $\pm$ 1.0 (2070)    |                        |
| 65-79     |           | 18.0 $\pm$ 0.6 (4577) | 19.3 $\pm$ 0.6 (4921)    |                        |
| 80+       |           | 12.0 $\pm$ 0.9 (1400) | 11.8 $\pm$ 0.7 (2713)    |                        |
| 18-mo RSR |           |                       |                          |                        |
| All       |           | 12.7 $\pm$ 0.3        | 13.1 $\pm$ 0.3           |                        |
| 0-49      |           | 21.2 $\pm$ 1.4        | 29.8 $\pm$ 1.9**         |                        |
| 50-64     |           | 14.9 $\pm$ 0.7        | 17.9 $\pm$ 0.9*          |                        |
| 65-79     |           | 11.1 $\pm$ 0.5        | 12.2 $\pm$ 0.5           |                        |
| 80+       |           | 8.2 $\pm$ 0.8         | 7.4 $\pm$ 0.5            |                        |
| 01-10     |           | 12-mo RSR             |                          |                        |
|           |           | All                   | 28.3 $\pm$ 0.4 (12232)   | 28.1 $\pm$ 0.4 (12173) |
|           | 0-49      | 40.7 $\pm$ 1.5 (1063) | 48.3 $\pm$ 1.8 (821)*    |                        |
|           | 50-64     | 32.8 $\pm$ 0.7 (4454) | 37.4 $\pm$ 0.9 (3101)*** |                        |
|           | 65-79     | 25.9 $\pm$ 0.6 (4856) | 26.7 $\pm$ 0.6 (5090)    |                        |
|           | 80+       | 16.2 $\pm$ 0.9 (1859) | 15.4 $\pm$ 0.7 (3161)    |                        |
|           | 18-mo RSR |                       |                          |                        |
|           | All       | 18.8 $\pm$ 0.4        | 19.1 $\pm$ 0.4           |                        |
|           | 0-49      | 30.3 $\pm$ 1.4        | 39.2 $\pm$ 1.7***        |                        |
|           | 50-64     | 21.6 $\pm$ 0.6        | 25.9 $\pm$ 0.8***        |                        |
|           | 65-79     | 16.8 $\pm$ 0.6        | 17.7 $\pm$ 0.6           |                        |
|           | 80+       | 10.5 $\pm$ 0.8        | 8.9 $\pm$ 0.6            |                        |

Abbreviations: mo, month; RSR, relative survival rate; SEM, standard error of the mean.

\* $p < 0.01$ , \*\* $p < 0.001$ , and \*\*\* $p < 0.0001$  for comparisons with the Male group.



**Supplementary Table S3.** Summary data for Cox regression analysis of survival in patients with PaCa from 2001 to 2010 at nine SEER sites.

| Variable               | Relative Risk (95% CI) | p-value |
|------------------------|------------------------|---------|
| <b>All</b>             |                        |         |
| Univariate             |                        |         |
| Sex                    | 0.996 (0.969 - 1.024)  | 0.782   |
| Age                    | 1.022 (1.021 - 1.023)  | < 0.001 |
| Race                   | 0.887 (0.852 - 0.923)  | < 0.001 |
| SES                    | 0.920 (0.894 - 0.946)  | < 0.001 |
| Multivariate           |                        |         |
| Age                    | 1.023 (1.022 - 1.024)  | < 0.001 |
| Race                   | 0.838 (0.804 - 0.873)  | < 0.001 |
| SES                    | 0.936 (0.909 - 0.963)  | < 0.001 |
| <b>Age 0-49 years</b>  |                        |         |
| Univariate             |                        |         |
| Sex                    | 1.254 (1.126 - 1.398)  | < 0.001 |
| Age                    | 1.050 (1.039 - 1.061)  | < 0.001 |
| Race                   | 0.898 (0.785 - 1.029)  | 0.120   |
| SES                    | 0.879 (0.788 - 0.980)  | 0.020   |
| Multivariate           |                        |         |
| Sex                    | 1.217 (1.092 - 1.356)  | < 0.001 |
| Age                    | 1.049 (1.038 - 1.060)  | < 0.001 |
| <b>Age 50-64 years</b> |                        |         |
| Univariate             |                        |         |
| Sex                    | 1.131 (1.075 - 1.191)  | < 0.001 |
| Age                    | 1.016 (1.010 - 1.023)  | < 0.001 |
| Race                   | 0.808 (0.756 - 0.865)  | < 0.001 |
| SES                    | 0.886 (0.842 - 0.933)  | < 0.001 |
| Multivariate           |                        |         |
| Sex                    | 1.146 (1.088 - 1.206)  | < 0.001 |
| Age                    | 1.017 (1.011 - 1.023)  | < 0.001 |
| Race                   | 0.819 (0.764 - 0.878)  | < 0.001 |
| SES                    | 0.911 (0.865 - 0.960)  | < 0.001 |
| <b>Age 65-79 years</b> |                        |         |
| Univariate             |                        |         |
| Sex                    | 1.034 (0.990 - 1.079)  | 0.132   |
| Age                    | 1.023 (1.018 - 1.028)  | < 0.001 |
| Race                   | 0.817 (0.765 - 0.872)  | < 0.001 |
| SES                    | 0.924 (0.884 - 0.965)  | < 0.001 |
| Multivariate           |                        |         |
| Age                    | 1.024 (1.019 - 1.029)  | < 0.001 |
| Race                   | 0.825 (0.771 - 0.882)  | < 0.001 |
| SES                    | 0.938 (0.896 - 0.981)  | 0.005   |

**Age 80+ years**

Univariate

|      |                       |         |
|------|-----------------------|---------|
| Sex  | 0.973 (0.916 - 1.035) | 0.387   |
| Age  | 1.036 (1.029 - 1.044) | < 0.001 |
| Race | 0.854 (0.773 - 0.944) | 0.002   |
| SES  | 0.951 (0.894 - 1.010) | 0.103   |

Multivariate

|      |                       |         |
|------|-----------------------|---------|
| Age  | 1.036 (1.028 - 1.043) | < 0.001 |
| Race | 0.861 (0.779 - 0.952) | 0.003   |

---

Abbreviations: 95% CI, 95% confidence interval; SES, socioeconomic status.

**Supplementary Table S4.** 12-month and 18-month relative survival rates of PaCa patients according to race, age group, and calendar period from 1981 to 2010 at nine SEER sites. Data are means  $\pm$  standard error of the mean, with number of patients in parentheses.

| Decade    | Age Group | Race                   |                          |                          |                       |
|-----------|-----------|------------------------|--------------------------|--------------------------|-----------------------|
|           |           | White                  | Black                    | Other                    |                       |
| 81-90     | 12-mo RSR |                        |                          |                          |                       |
|           | All       | 17.0 $\pm$ 0.3 (15977) | 16.0 $\pm$ 0.8 (2029)    | 18.7 $\pm$ 1.2 (1005)    |                       |
|           | 0-49      | 29.0 $\pm$ 1.5 (893)   | 29.9 $\pm$ 3.3 (192)     | 23.9 $\pm$ 4.6 (88)      |                       |
|           | 50-64     | 21.7 $\pm$ 0.6 (4118)  | 18.5 $\pm$ 1.5 (712)     | 23.7 $\pm$ 2.5 (291)     |                       |
|           | 65-79     | 15.7 $\pm$ 0.4 (7585)  | 12.0 $\pm$ 1.1 (862)*    | 17.4 $\pm$ 1.8 (481)     |                       |
|           | 80+       | 10.9 $\pm$ 0.6 (3381)  | 11.9 $\pm$ 2.1 (263)     | 9.7 $\pm$ 2.6 (145)      |                       |
|           | 18-mo RSR |                        |                          |                          |                       |
|           | All       | 9.6 $\pm$ 0.2          | 10.2 $\pm$ 0.7           | 11.4 $\pm$ 1.0           |                       |
|           | 0-49      | 19.0 $\pm$ 1.3         | 21.6 $\pm$ 3.0           | 18.2 $\pm$ 4.1           |                       |
|           | 50-64     | 12.2 $\pm$ 0.5         | 11.5 $\pm$ 1.2           | 12.6 $\pm$ 2.0           |                       |
|           | 65-79     | 8.5 $\pm$ 0.3          | 6.8 $\pm$ 0.9            | 10.8 $\pm$ 1.4           |                       |
|           | 80+       | 6.3 $\pm$ 0.5          | 8.9 $\pm$ 1.9            | 6.9 $\pm$ 2.2            |                       |
|           | 91-00     | 12-mo RSR              |                          |                          |                       |
|           |           | All                    | 20.0 $\pm$ 0.3 (16311)   | 17.6 $\pm$ 0.8 (2377)*   | 22.3 $\pm$ 1.1 (1394) |
| 0-49      |           | 35.9 $\pm$ 1.4 (1102)  | 30.7 $\pm$ 2.9 (263)     | 32.2 $\pm$ 4.4 (115)     |                       |
| 50-64     |           | 24.7 $\pm$ 0.7 (3909)  | 19.2 $\pm$ 1.5 (745)*    | 29.0 $\pm$ 2.5 (345)     |                       |
| 65-79     |           | 18.8 $\pm$ 0.5 (7782)  | 15.5 $\pm$ 1.2 (1021)    | 21.3 $\pm$ 1.6 (688)     |                       |
| 80+       |           | 12.1 $\pm$ 0.6 (3518)  | 9.9 $\pm$ 1.7 (348)      | 10.9 $\pm$ 2.1 (246)     |                       |
| 18-mo RSR |           |                        |                          |                          |                       |
| All       |           | 12.9 $\pm$ 0.3         | 11.2 $\pm$ 0.7           | 16.3 $\pm$ 1.0*          |                       |
| 0-49      |           | 25.1 $\pm$ 1.3         | 20.0 $\pm$ 2.5           | 27.9 $\pm$ 4.2           |                       |
| 50-64     |           | 16.3 $\pm$ 0.6         | 12.5 $\pm$ 1.2*          | 20.9 $\pm$ 2.2           |                       |
| 65-79     |           | 11.6 $\pm$ 0.4         | 10.0 $\pm$ 1.0           | 14.7 $\pm$ 1.4           |                       |
| 80+       |           | 7.8 $\pm$ 0.5          | 5.1 $\pm$ 1.3            | 8.5 $\pm$ 1.9            |                       |
| 01-10     |           | 12-mo RSR              |                          |                          |                       |
|           |           | All                    | 28.8 $\pm$ 0.3 (19149)   | 24.0 $\pm$ 0.8 (2950)*** | 28.0 $\pm$ 1.0 (2236) |
|           | 0-49      | 44.7 $\pm$ 1.3 (1379)  | 39.5 $\pm$ 2.8 (315)     | 44.8 $\pm$ 3.8 (180)     |                       |
|           | 50-64     | 36.0 $\pm$ 0.6 (5760)  | 28.3 $\pm$ 1.4 (1118)*** | 33.5 $\pm$ 1.9 (654)     |                       |
|           | 65-79     | 27.3 $\pm$ 0.5 (7889)  | 20.1 $\pm$ 1.3 (1076)*** | 25.2 $\pm$ 1.4 (949)     |                       |
|           | 80+       | 15.8 $\pm$ 0.6 (4121)  | 11.3 $\pm$ 1.6 (441)     | 19.4 $\pm$ 1.9 (453)     |                       |
|           | 18-mo RSR |                        |                          |                          |                       |
|           | All       | 19.4 $\pm$ 0.3         | 16.1 $\pm$ 0.7***        | 18.7 $\pm$ 0.9           |                       |
|           | 0-49      | 35.0 $\pm$ 1.3         | 31.6 $\pm$ 2.7           | 32.3 $\pm$ 3.6           |                       |
|           | 50-64     | 24.2 $\pm$ 0.6         | 18.3 $\pm$ 1.2***        | 23.6 $\pm$ 1.7           |                       |
|           | 65-79     | 17.9 $\pm$ 0.4         | 13.0 $\pm$ 1.1***        | 16.5 $\pm$ 1.2           |                       |
|           | 80+       | 9.7 $\pm$ 0.5          | 6.4 $\pm$ 1.3            | 10.8 $\pm$ 1.6           |                       |

Abbreviations: mo, month; RSR, relative survival rate; SEM, standard error of the mean.

\* $p < 0.01$ , \*\* $p < 0.001$ , and \*\*\* $p < 0.0001$  for comparisons with the White group.

**Supplementary Table S5.** 12-month and 18-month relative survival rates of PaCa patients according to SES, age group, and calendar period from 1981 to 2010 at nine SEER sites. Data are means  $\pm$  standard error of the mean, with number of patients in parenthesis.

| Decade | Age Group | SES                    |                          |                       |
|--------|-----------|------------------------|--------------------------|-----------------------|
|        |           | Low Poverty            | Medium Poverty           | High Poverty          |
| 81-90  | 12-mo RSR |                        |                          |                       |
|        | All       | 17.9 $\pm$ 0.4 (10321) | 16.0 $\pm$ 0.4 (8297)**  | 14.7 $\pm$ 1.8 (404)  |
|        | 0-49      | 29.0 $\pm$ 1.8 (627)   | 28.3 $\pm$ 2.0 (529)     | 31.7 $\pm$ 10.7 (19)  |
|        | 50-64     | 23.9 $\pm$ 0.8 (2723)  | 18.7 $\pm$ 0.8 (2307)*** | 15.7 $\pm$ 3.7 (97)   |
|        | 65-79     | 16.0 $\pm$ 0.5 (4844)  | 14.8 $\pm$ 0.6 (3875)    | 14.7 $\pm$ 2.5 (212)  |
|        | 80+       | 11.0 $\pm$ 0.7 (2127)  | 10.9 $\pm$ 0.8 (1586)    | 8.9 $\pm$ 3.5 (76)    |
|        | 18-mo RSR |                        |                          |                       |
|        | All       | 10.3 $\pm$ 0.3         | 9.1 $\pm$ 0.3*           | 8.4 $\pm$ 1.4         |
|        | 0-49      | 20.2 $\pm$ 1.6         | 18.1 $\pm$ 1.7           | 26.4 $\pm$ 10.1       |
|        | 50-64     | 13.4 $\pm$ 0.7         | 10.6 $\pm$ 0.7*          | 8.4 $\pm$ 2.8         |
|        | 65-79     | 9.0 $\pm$ 0.4          | 7.8 $\pm$ 0.4            | 7.5 $\pm$ 1.9         |
|        | 80+       | 6.3 $\pm$ 0.6          | 6.8 $\pm$ 0.7            | 6.3 $\pm$ 3.1         |
| 91-00  | 12-mo RSR |                        |                          |                       |
|        | All       | 20.8 $\pm$ 0.4 (11219) | 18.8 $\pm$ 0.4 (8452)**  | 18.8 $\pm$ 1.9 (430)  |
|        | 0-49      | 36.3 $\pm$ 1.7 (818)   | 32.9 $\pm$ 1.9 (635)     | 32.3 $\pm$ 8.4 (31)   |
|        | 50-64     | 25.7 $\pm$ 0.8 (2787)  | 22.4 $\pm$ 0.9 (2114)*   | 24.1 $\pm$ 4.2 (105)  |
|        | 65-79     | 19.5 $\pm$ 0.6 (5235)  | 17.7 $\pm$ 0.6 (4055)    | 15.9 $\pm$ 2.6 (208)  |
|        | 80+       | 12.3 $\pm$ 0.7 (2379)  | 11.2 $\pm$ 0.8 (1648)    | 14.1 $\pm$ 4.0 (86)   |
|        | 18-mo RSR |                        |                          |                       |
|        | All       | 13.7 $\pm$ 0.3         | 12.0 $\pm$ 0.4**         | 11.0 $\pm$ 1.6        |
|        | 0-49      | 26.7 $\pm$ 1.6         | 22.3 $\pm$ 1.7           | 16.2 $\pm$ 6.6        |
|        | 50-64     | 17.1 $\pm$ 0.7         | 14.9 $\pm$ 0.8           | 13.6 $\pm$ 3.4        |
|        | 65-79     | 12.4 $\pm$ 0.5         | 10.6 $\pm$ 0.5           | 11.1 $\pm$ 2.2        |
|        | 80+       | 7.9 $\pm$ 0.6          | 7.5 $\pm$ 0.7            | 5.4 $\pm$ 2.6         |
| 01-10  | 12-mo RSR |                        |                          |                       |
|        | All       | 29.7 $\pm$ 0.4 (14695) | 26.0 $\pm$ 0.5 (9029)*** | 22.7 $\pm$ 1.9 (497)* |
|        | 0-49      | 46.9 $\pm$ 1.5 (1171)  | 39.0 $\pm$ 1.9 (682)*    | 42.0 $\pm$ 8.9 (31)   |
|        | 50-64     | 36.5 $\pm$ 0.7 (4480)  | 32.4 $\pm$ 0.9 (2911)**  | 25.4 $\pm$ 3.4 (163)* |
|        | 65-79     | 27.8 $\pm$ 0.6 (5922)  | 24.4 $\pm$ 0.7 (3795)**  | 21.4 $\pm$ 2.8 (227)  |
|        | 80+       | 16.6 $\pm$ 0.7 (3122)  | 14.1 $\pm$ 0.9 (1821)    | 12.8 $\pm$ 4.0 (76)   |
|        | 18-mo RSR |                        |                          |                       |
|        | All       | 20.0 $\pm$ 0.3         | 17.6 $\pm$ 0.4***        | 13.4 $\pm$ 1.6***     |
|        | 0-49      | 36.4 $\pm$ 1.4         | 30.4 $\pm$ 1.8*          | 34.9 $\pm$ 8.7        |
|        | 50-64     | 24.7 $\pm$ 0.7         | 21.7 $\pm$ 0.8*          | 15.2 $\pm$ 2.9        |
|        | 65-79     | 18.2 $\pm$ 0.5         | 16.2 $\pm$ 0.6           | 11.3 $\pm$ 2.2*       |
|        | 80+       | 10.0 $\pm$ 0.6         | 8.8 $\pm$ 0.7            | 7.4 $\pm$ 3.2         |

Abbreviations: mo, month; RSR, relative survival rate; SEM, standard error of the mean.

\* $p < 0.01$ , \*\* $p < 0.001$ , and \*\*\* $p < 0.0001$  for comparisons with the White group.

**Supplementary Table S6.** Summary data for race distribution by SES and calendar period in patients with PaCa from 1981 to 2010 at nine SEER sites.

| Period | SES            | Number | Race  |       |       |
|--------|----------------|--------|-------|-------|-------|
|        |                |        | White | Black | Other |
| 81-10  | Total          | 63422  | 81.1% | 11.6% | 7.3%  |
|        | Low Poverty    | 36174  | 89.7% | 5.3%  | 5.0%  |
|        | Medium Poverty | 25917  | 68.7% | 20.9% | 10.4% |
|        | High Poverty   | 1331   | 87.4% | 1.6%  | 11.0% |
| 81-90  | Total          | 19009  | 84.0% | 10.7% | 5.3%  |
|        | Low Poverty    | 10313  | 94.8% | 3.8%  | 1.5%  |
|        | Medium Poverty | 8292   | 70.5% | 19.7% | 9.8%  |
|        | High Poverty   | 404    | 87.6% | 2.0%  | 10.4% |
| 91-00  | Total          | 20082  | 81.2% | 11.8% | 6.9%  |
|        | Low Poverty    | 11212  | 91.8% | 5.2%  | 3.0%  |
|        | Medium Poverty | 8440   | 66.7% | 21.2% | 12.1% |
|        | High Poverty   | 430    | 90.0% | 1.4%  | 8.6%  |
| 01-10  | Total          | 24331  | 78.7% | 12.1% | 9.2%  |
|        | Low Poverty    | 14649  | 84.6% | 6.5%  | 9.0%  |
|        | Medium Poverty | 9185   | 69.0% | 21.7% | 9.3%  |
|        | High Poverty   | 497    | 84.9% | 1.4%  | 13.7% |
